# Supplementary material for: A human-in-the-loop approach for visual clustering of overlapping materials science data
Source: Royal Society of Chemistry journal article supplement (doi:10.1039/d3dd00179b), 2024-01-01
Supplement: d3dd00179b1.pdf [file d3dd00179b1.pdf]

# Supporting Information for: A

## Human-in-the-loop Approach for Visual Clustering of Overlapping Materials Science Data

Satyanarayana Bonakala,<sup>†</sup> Michael Aupetit,<sup>‡</sup> Halima Bensmail,<sup>‡</sup> and Fedwa  
El-Mellouhi<sup>\*,†</sup>

<sup>†</sup>*Qatar Environment and Energy Research Institute, Hamad Bin Khalifa University, P.O.  
BOX 34110, Doha, Qatar*

<sup>‡</sup>*Qatar Computing Research Institute, Hamad Bin Khalifa University, P.O. BOX 34110,  
Doha, Qatar*

E-mail: [felmellouhi@hbku.edu.qa](mailto:felmellouhi@hbku.edu.qa)

Phone: +XXXXXXX. Fax: +XXXXXXX

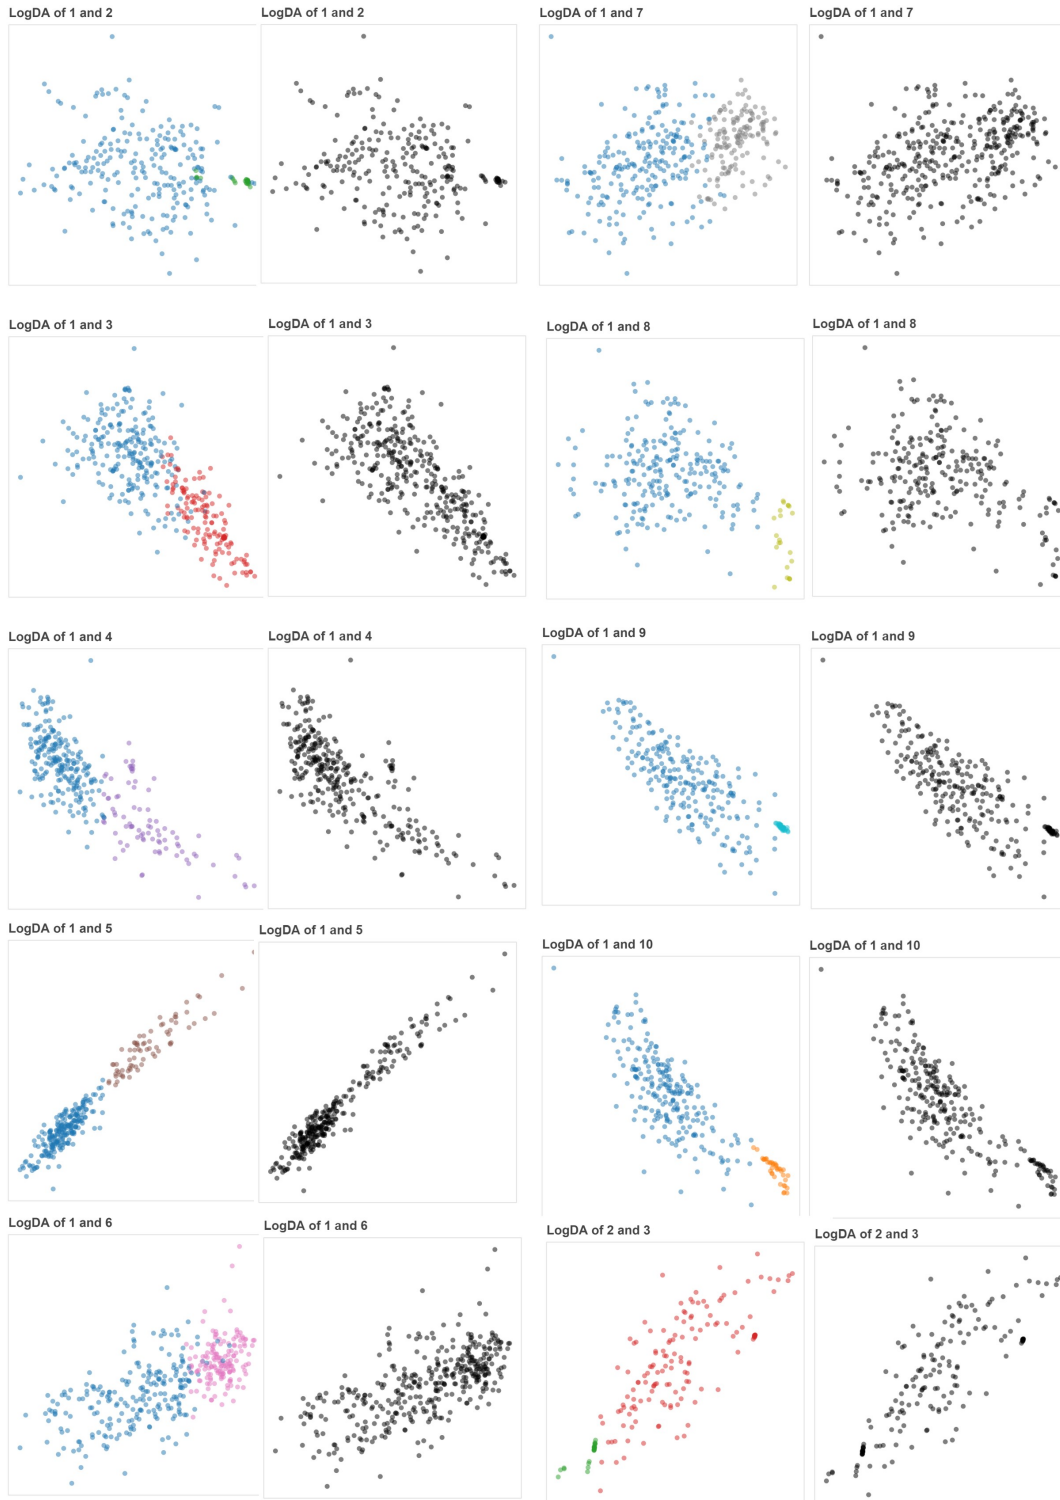

Figure S1: LogDA plots between the pairs of clusters observed from GMM-EDDA method. Left and right side panels represent the colour and black-and-white scatter plots. The index of the clusters is present at the top left corner.

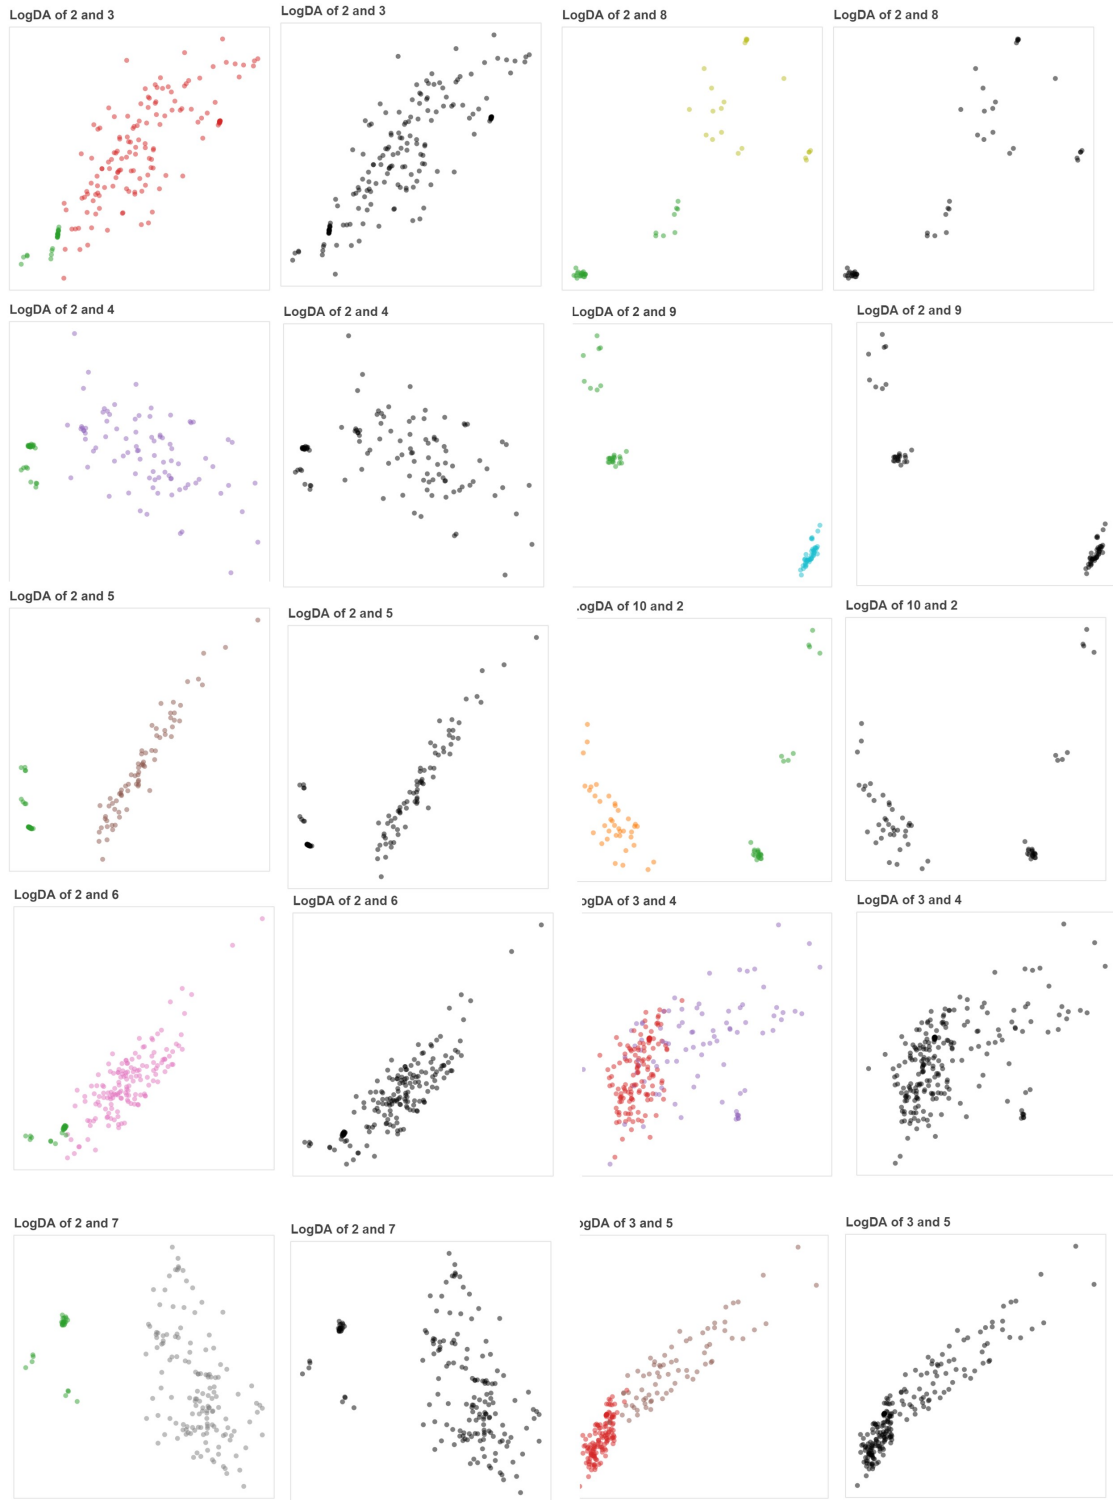

Figure S2: LogDA plots between the pairs of clusters observed from GMM-EDDA method. Left and right side panels represent the colour and black-and-white scatter plots. The index of the clusters is present at the top left corner.

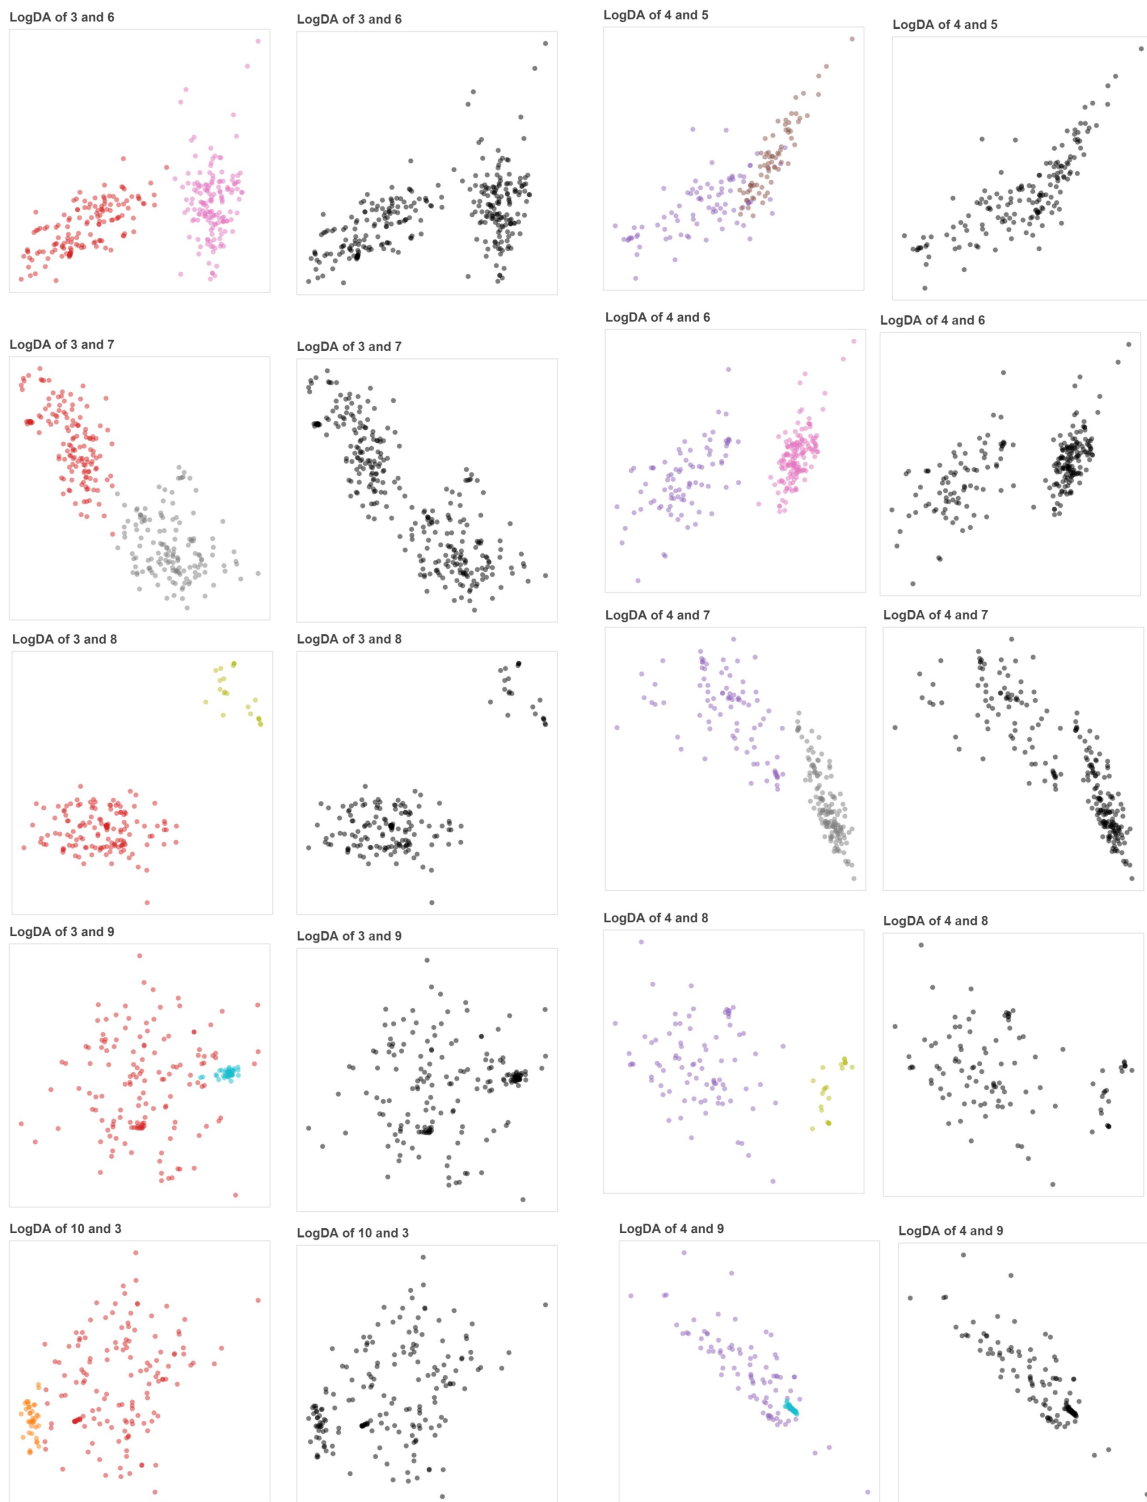

Figure S3: LogDA plots between the pairs of clusters observed from GMM-EDDA method. Left and right side panels represent the colour and black-and-white scatter plots. The index of the clusters is present at the top left corner.

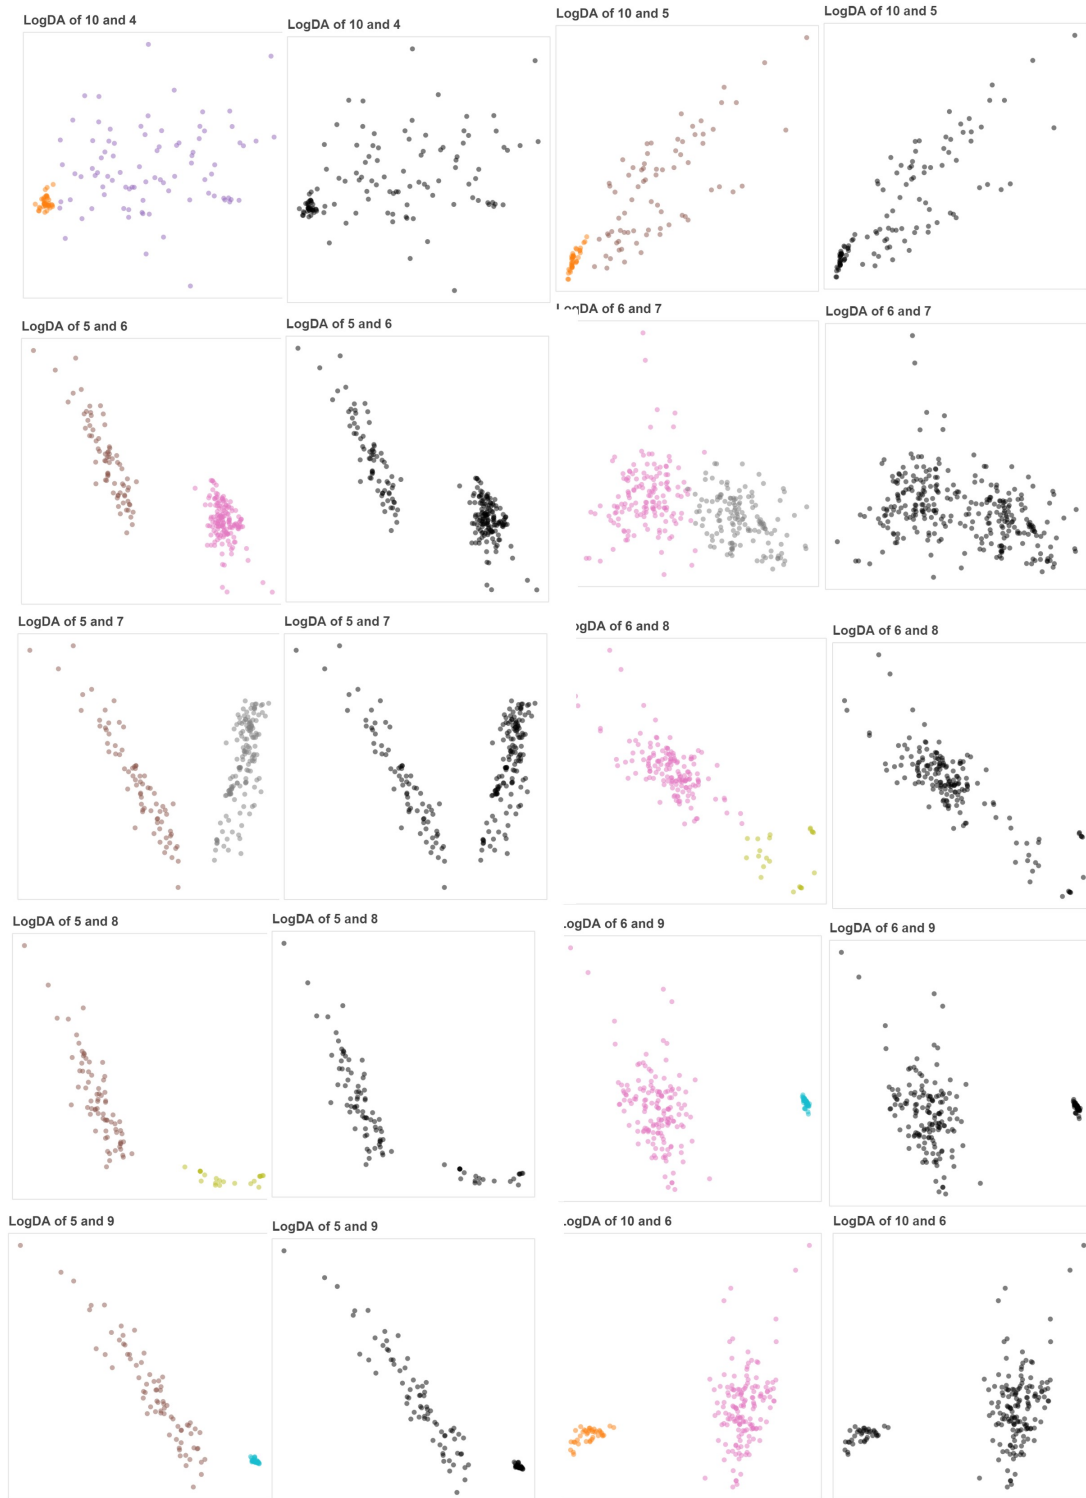

Figure S4: LogDA plots between the pairs of clusters observed from GMM-EDDA method. Left and right side panels represent the colour and black-and-white scatter plots. The index of the clusters is present at the top left corner.

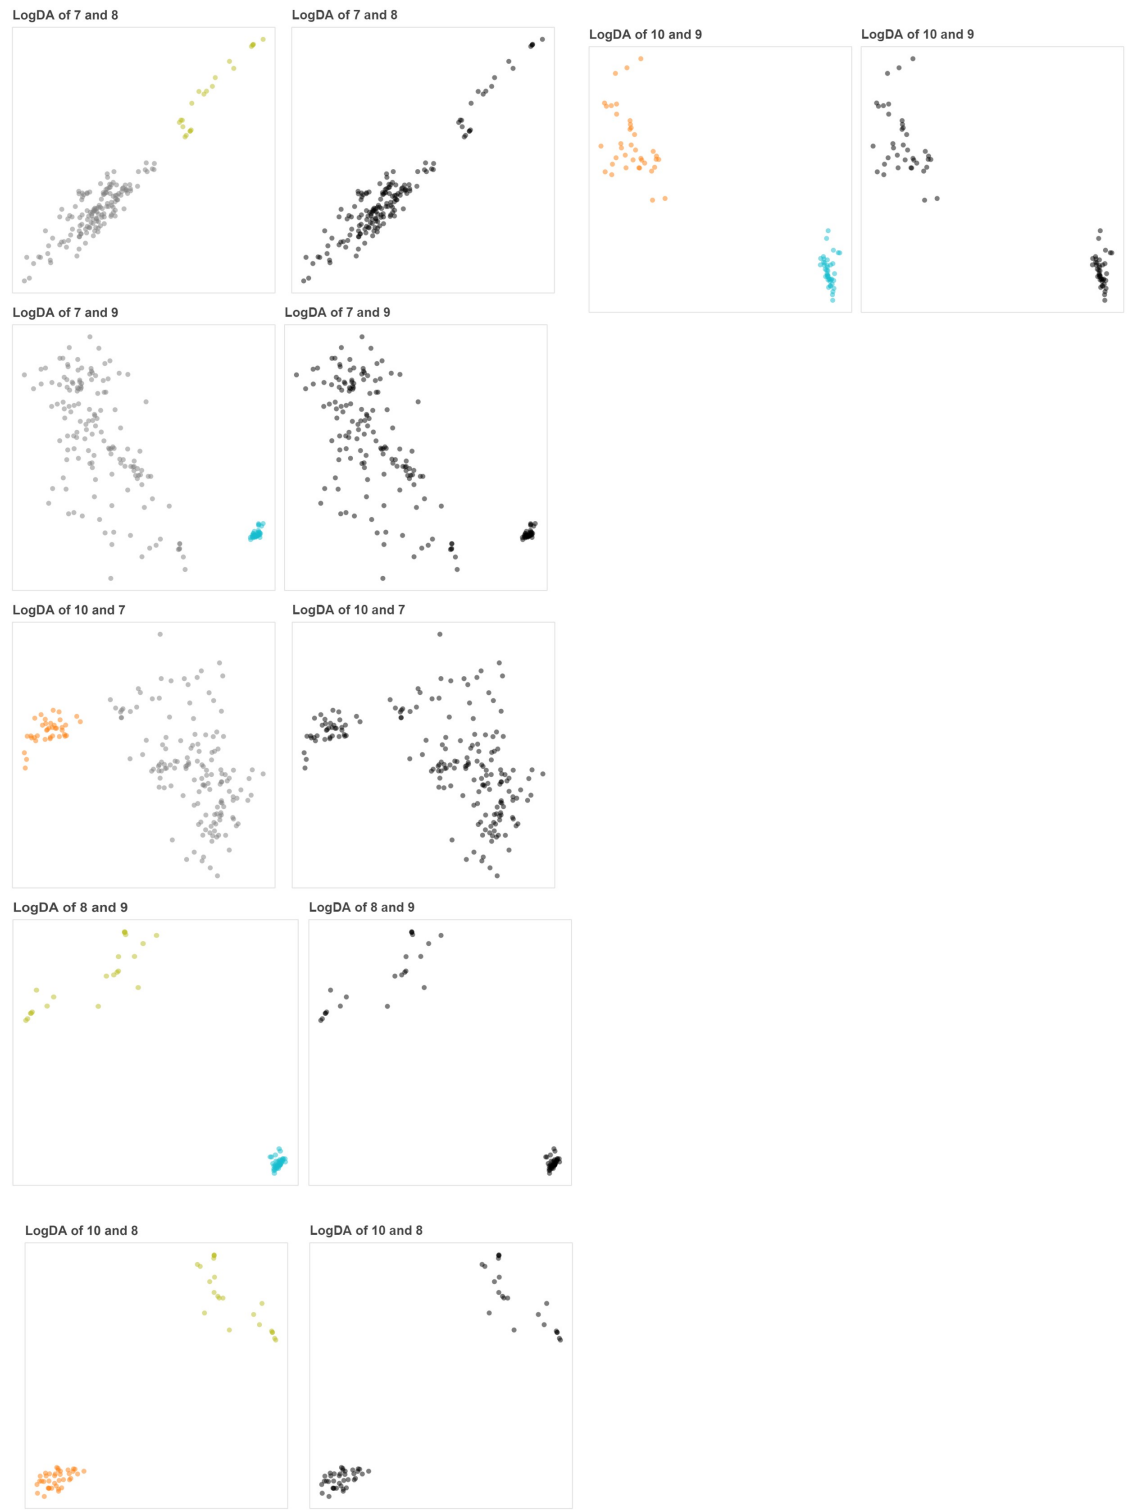

Figure S5: LogDA plots between the pairs of clusters observed from GMM-EDDA method. Left and right side panels represent the colour and black-and-white scatter plots. The index of the clusters is present at the top left corner.

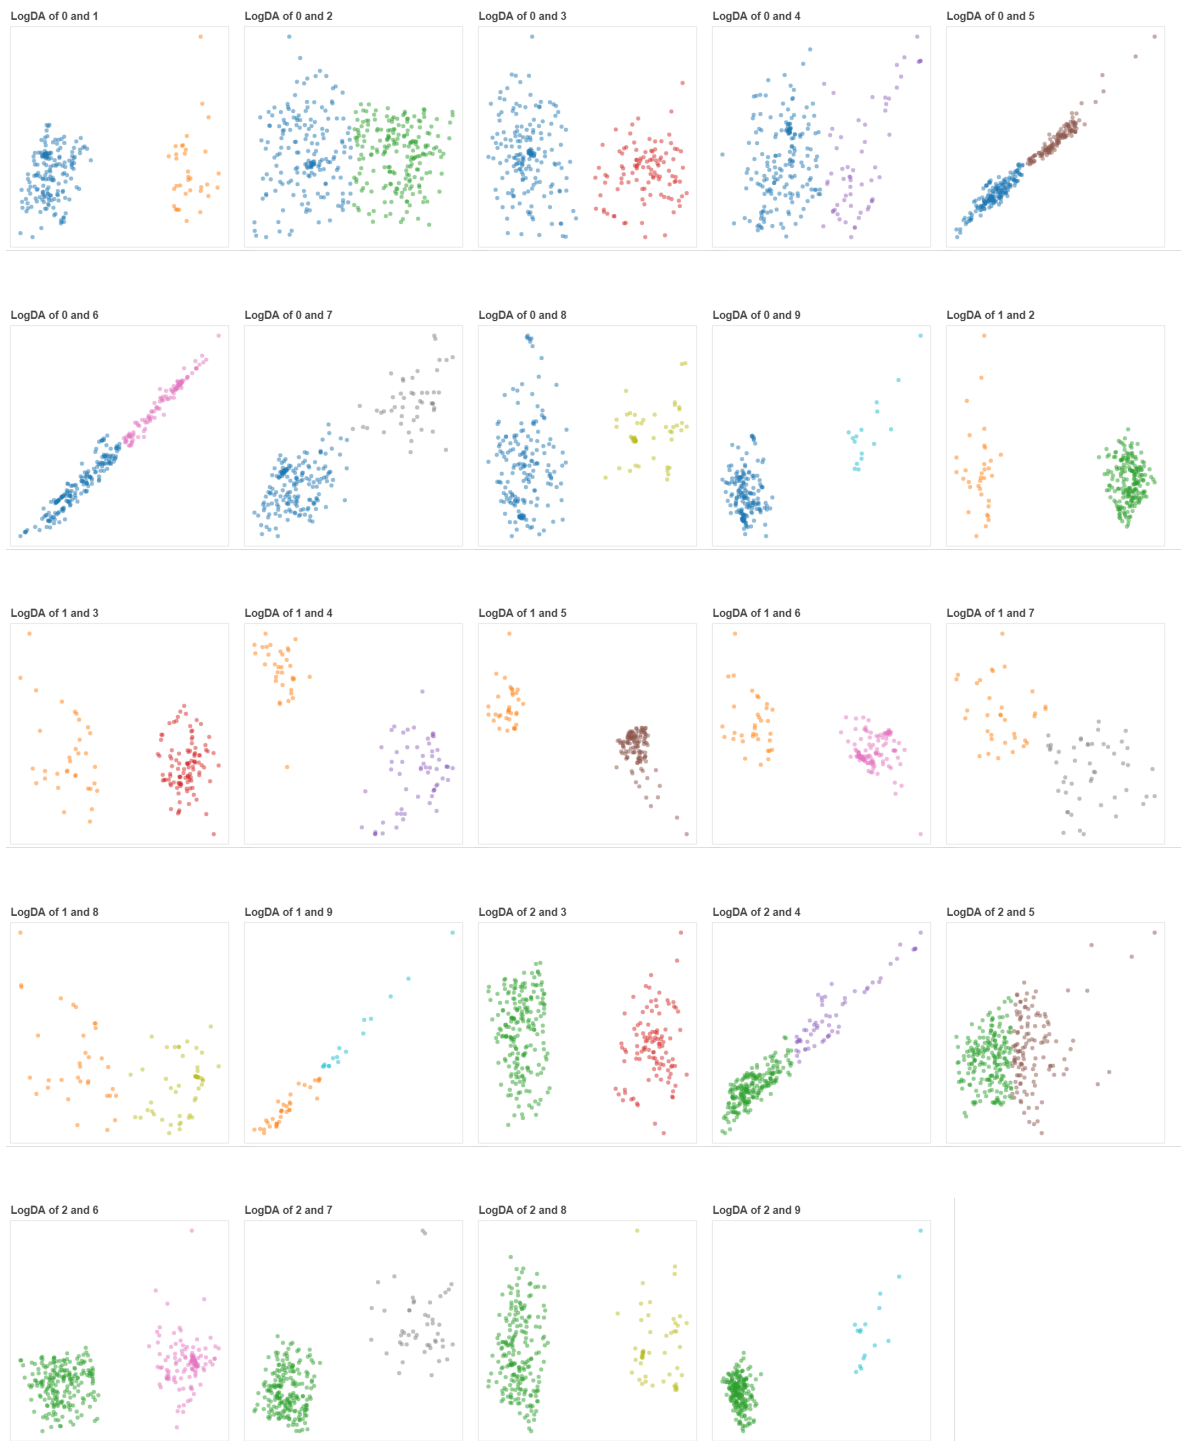

Figure S6: LogDA plots between the pairs of clusters observed from Kmeans method (K=10). The index of the clusters is present at the top left corner.

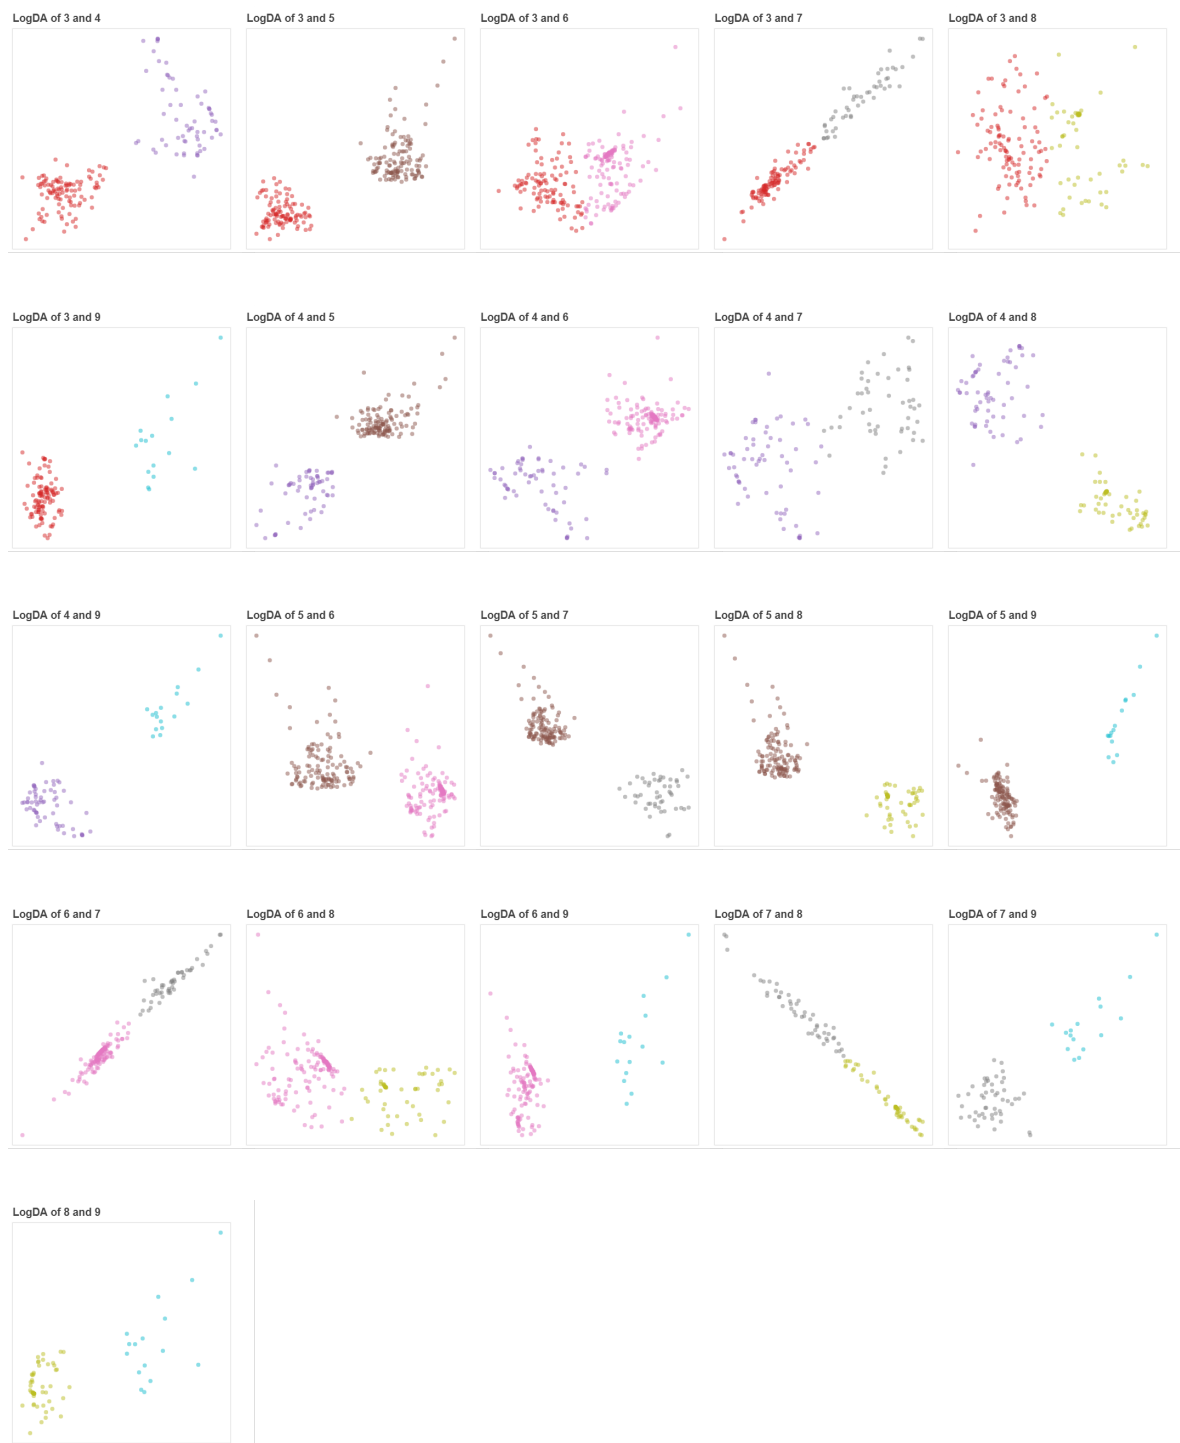

Figure S7: LogDA plots between the pairs of clusters observed from Kmeans method (K=10). The index of the clusters is present at the top left corner.
